# Supplementary material for: Cochlear Aqueduct Morphology in Superior Canal Dehiscence Syndrome
Source: MDPI journal article supplement (doi:10.3390/audiolres13030032), 2023-05-15
Supplement: s1 [file s1]

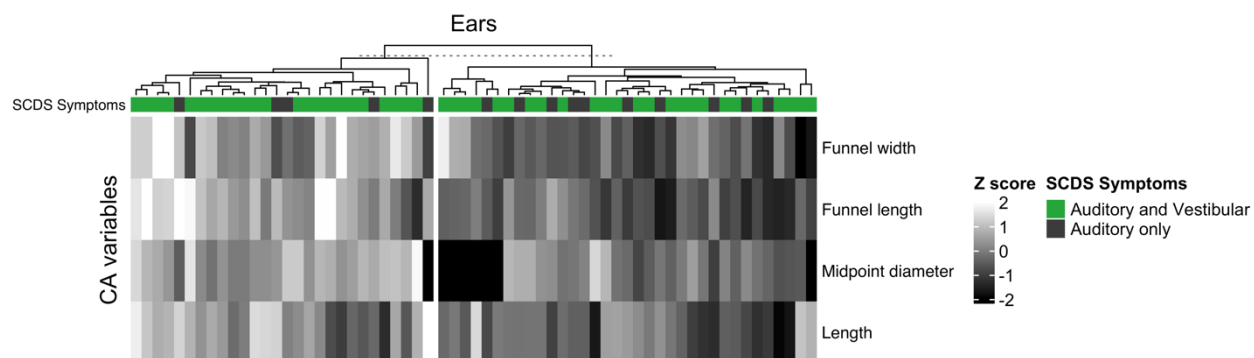

**Figure S1. Hierarchical clustering of SCDS ears by cochlear aqueduct measurement.** Each individual SCDS ear is a column. K-means based hierarchical clustering was then used to classify SCDS ears into two clusters using the four CA variables as shown by the tree diagram. SCDS symptom grouping for each ear is annotated above clusters. Ears with Type 4 CAs were removed from clustering.
