# Supplementary material for: Cochlear Aqueduct Morphology in Superior Canal Dehiscence Syndrome
Source: MDPI journal article supplement (doi:10.3390/audiolres13030032), 2023-05-15
Supplement: s1 [file s1]

**Table S1.** Demographics, CA measurements, CA classification and SCDS symptoms by CA cluster for SCDS ears.

| Variable                          | Cluster 1, N = 38 <sup>1</sup> | Cluster 2, N = 25 <sup>1</sup> | p-value <sup>2</sup> |
|-----------------------------------|--------------------------------|--------------------------------|----------------------|
| Age, y                            | 48.4 ± 13.5                    | 48.9 ± 9.81                    | 0.87                 |
| BMI,                              | 27.1 (22.5, 31.3)              | 25.8 (21.3, 28.8)              | 0.32                 |
| Sex (Female)                      | 23 / 38 (61%)                  | 19 / 25 (76%)                  | 0.20                 |
| Race                              |                                |                                | 0.017                |
| White                             | 37 / 38 (97%)                  | 25 / 25 (100%)                 |                      |
| Other                             | 1 / 38 (2.6%)                  | 0 / 25 (0%)                    |                      |
| CA Funnel width (mm)              | 4.40 ± 1.15                    | 6.30 ± 1.25                    | †                    |
| CA Funnel length (mm)             | 3.98 ± 0.65                    | 5.41 ± 0.94                    | †                    |
| CA Midpoint diameter (mm)         | 0.29 (0.19, 0.35)              | 0.43 (0.37, 0.48)              | †                    |
| CA Length (mm)                    | 11.84 ± 2.18                   | 13.07 ± 1.80                   | †                    |
| Migirov-Kronenberg Classification |                                |                                | 0.054                |
| Type 1                            | 25 / 38 (66%)                  | 16 / 25 (64%)                  |                      |
| Type 2                            | 3 / 38 (7.9%)                  | 7 / 25 (28%)                   |                      |
| Type 3                            | 10 / 38 (26%)                  | 2 / 25 (8.0%)                  |                      |
| SCDS Symptoms                     |                                |                                | 0.24                 |
| Auditory and Vestibular           | 27 / 38 (71%)                  | 21 / 25 (84%)                  |                      |
| Auditory alone                    | 11 / 38 (29%)                  | 4 / 25 (16%)                   |                      |

<sup>1</sup>n / N (%), median (IQR), mean ± SD. <sup>2</sup>Pearson's Chi-squared test; Fisher's exact test; One-way ANOVA; Kruskal-Wallis rank sum test; Wilcoxon rank sum test. † Variable was used for cluster generation; hence, no significance testing was performed to prevent circular analysis. Note: Ears with Type 4 CAs were removed from clustering, one in control and one in SCDS.
